# Supplementary material for: A range of C∊3–C∊4 interdomain angles in IgE Fc accommodate binding to its receptor CD23
Source: PubMed Central journal article supplement (PMC3944690; doi:10.1107/s2053230x14003355), 2014-02-20
Supplement: f-70-00305-sup1.pdf [file f-70-00305-sup1.pdf]

## Supporting Information

**Table S1. C $\epsilon$ 3 crystal contacts.**

(a) Ca<sup>2+</sup>-free derCD23/Fc $\epsilon$ 3-4 triclinic crystal form contact analysis (<4.0Å)

| Chain | Total contacts |
|-------|----------------|
| A     | 75             |
| B     | 69             |
| C     | 50             |
| D     | 60             |

(b) Ca<sup>2+</sup>-free derCD23/Fc $\epsilon$ 3-4 orthorhombic crystal form contact analysis (<4.0Å)

| Chain | Total contacts |
|-------|----------------|
| A     | 36             |
| B     | 44             |
| C     | 18             |
| D     | 50             |
| E     | 24             |
| F     | 18             |

(c) Ca<sup>2+</sup>-bound derCD23/Fc $\epsilon$ 3-4 orthorhombic crystal form contact analysis (<4.0Å)

| Chain | Total contacts |
|-------|----------------|
| A     | 46             |
| B     | 24             |
| C     | 10             |
| D     | 56             |
| E     | 13             |
| F     | 13             |
